# Supplementary material
Source: PubMed Central journal article supplement (PMC3142570)
Supplement: NIHMS305318-supplement-1.pdf [file NIHMS305318-supplement-1.pdf]

eAppendix

eTable 1. Estimated invasiveness based on linear regression

| Serotype | Predicted invasiveness |
|----------|------------------------|
| 1        | 98.8                   |
| 2        | 35.8                   |
| 3        | 3.5                    |
| 4        | 28.3                   |
| 5        | 49.3                   |
| 6A/C     | 14.1                   |
| 6B       | 18.6                   |
| 7F       | 65.1                   |
| 8        | 32.5                   |
| 9A       | 55.9                   |
| 9N       | 8.1                    |
| 9V       | 21.4                   |
| 10A      | 5.3                    |
| 11A      | 1.2                    |
| 12A      | 7.3                    |
| 12F      | 21.4                   |
| 13       | 14.7                   |
| 14       | 21.4                   |
| 15A      | 5.4                    |
| 15B      | 5.3                    |
| 15C      | 24.6                   |
| 16F      | 3.1                    |
| 17F      | 2.3                    |
| 18C      | 32.5                   |
| 19A      | 7.0                    |
| 19F      | 6.1                    |
| 20       | 14.1                   |
| 22F      | 16.2                   |
| 23A      | 5.3                    |
| 23F      | 10.7                   |
| 24F      | 10.7                   |
| 31       | 0.6                    |
| 33F      | 24.6                   |
| 34       | 2.8                    |
| 35B      | 14.5                   |
| 35F      | 2.0                    |
| 38       | 21.4                   |

The regression used to derive these estimates was fit to “attack rate” data from Sleeman et al., where invasiveness is defined as the number of disease cases/100,000 acquisitions

eTable 2. Expected number of cases of invasive pneumococcal disease per serotype calculated from model 1 (using carriage prevalence and invasiveness as predictors) or model 2 (using polysaccharide structure and invasiveness as predictors). Fit to disease data from England and Wales.

| Serotype | Expected (Model 1) | Expected (Model 2) | Observed |
|----------|--------------------|--------------------|----------|
| 1        | 15                 | 378                | 45       |
| 2        | 2                  | 16                 | 0        |
| 3        | 7                  | 38                 | 15       |
| 4        | 4                  | 19                 | 18       |
| 5        | 4                  | 22                 | 0        |
| 6A/C     | 38                 | 36                 | 27       |
| 6B       | 158                | 48                 | 77       |
| 7F       | 9                  | 6                  | 22       |
| 8        | 22                 | 74                 | 12       |
| 9A       | 4                  | 44                 | 0        |
| 9N       | 6                  | 4                  | 2        |
| 9V       | 32                 | 12                 | 26       |
| 10A      | 3                  | 1                  | 1        |
| 11A      | 1                  | 1                  | 0        |
| 12A      | 0                  | 1                  | 0        |
| 12F      | 6                  | 4                  | 1        |
| 13       | 2                  | 9                  | 0        |
| 14       | 60                 | 36                 | 156      |
| 15A      | 2                  | 3                  | 0        |
| 15B      | 5                  | 3                  | 2        |
| 15C      | 27                 | 19                 | 3        |
| 16F      | 2                  | 1                  | 0        |
| 17F      | 2                  | 0                  | 1        |
| 18C      | 40                 | 30                 | 49       |
| 19A      | 10                 | 26                 | 26       |
| 19F      | 37                 | 22                 | 68       |
| 20       | 6                  | 3                  | 3        |
| 22F      | 11                 | 6                  | 6        |
| 23A      | 3                  | 7                  | 3        |
| 23F      | 56                 | 15                 | 45       |
| 24F      | 3                  | -                  | 1        |
| 31       | 0                  | 0                  | 1        |
| 33F      | 17                 | 10                 | 5        |
| 34       | 0                  | 3                  | 1        |
| 35B      | 1                  | 10                 | 0        |
| 35F      | 1                  | 2                  | 2        |
| 38       | 11                 | -                  | 1        |

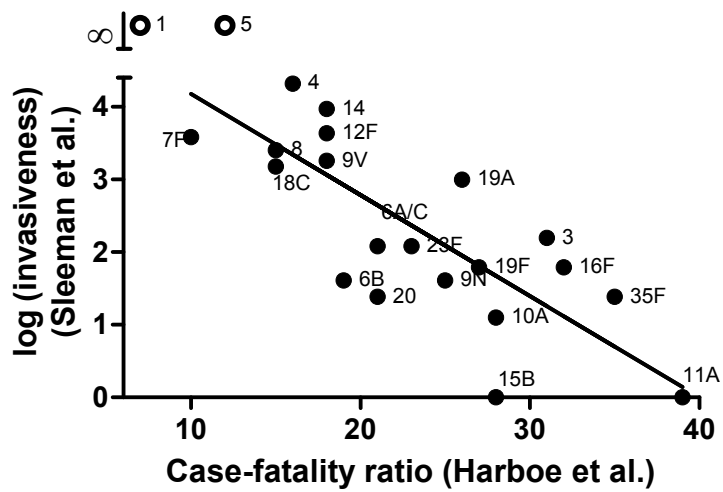

eFigure. Correlation between case-fatality ratio and log(invasiveness).  $r^2=0.58$ . Serotypes 1 and 5 were not used in the calculation of the regression.
